# Supplementary material
Source: PubMed Central journal article supplement (PMC5051541)

Supplementary Figure 1

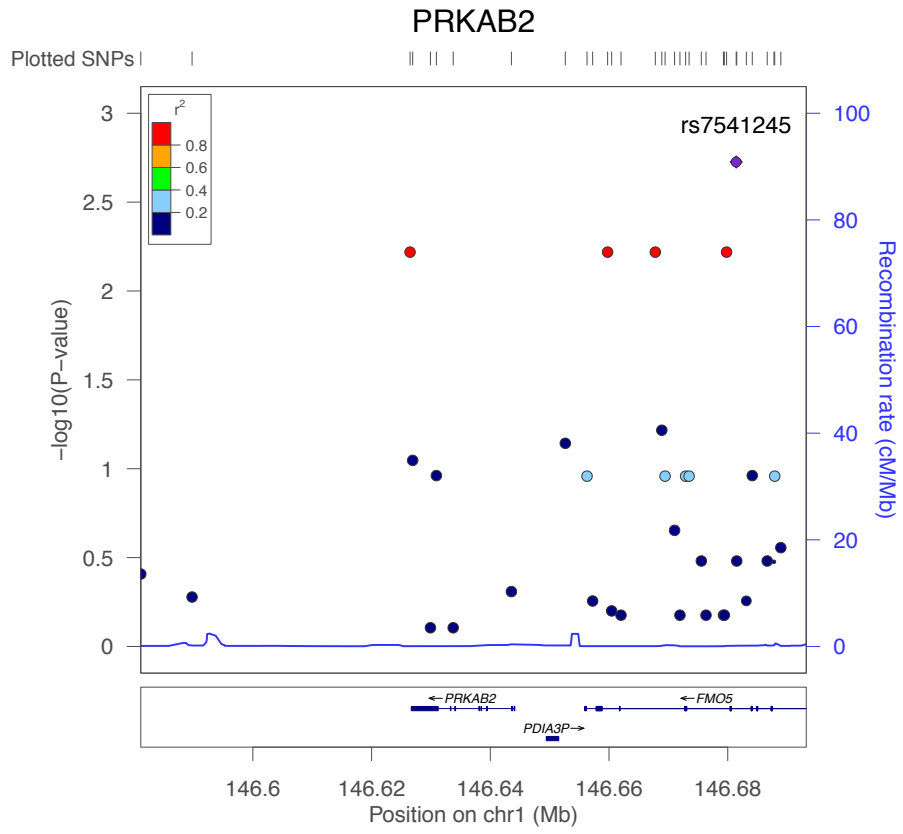

Supplement: NIHMS791410-supplement-supplement_1.pdf [file NIHMS791410-supplement-supplement_1.pdf]
